# Supplementary material for: Seven COVID-19 Patients Treated with C-Reactive Protein (CRP) Apheresis
Source: MDPI journal article supplement (doi:10.3390/jcm11071956), 2022-04-01
Supplement: s1 [file s1]

# Supplementary Material

## 1 Supplementary Figures

### Patient 1

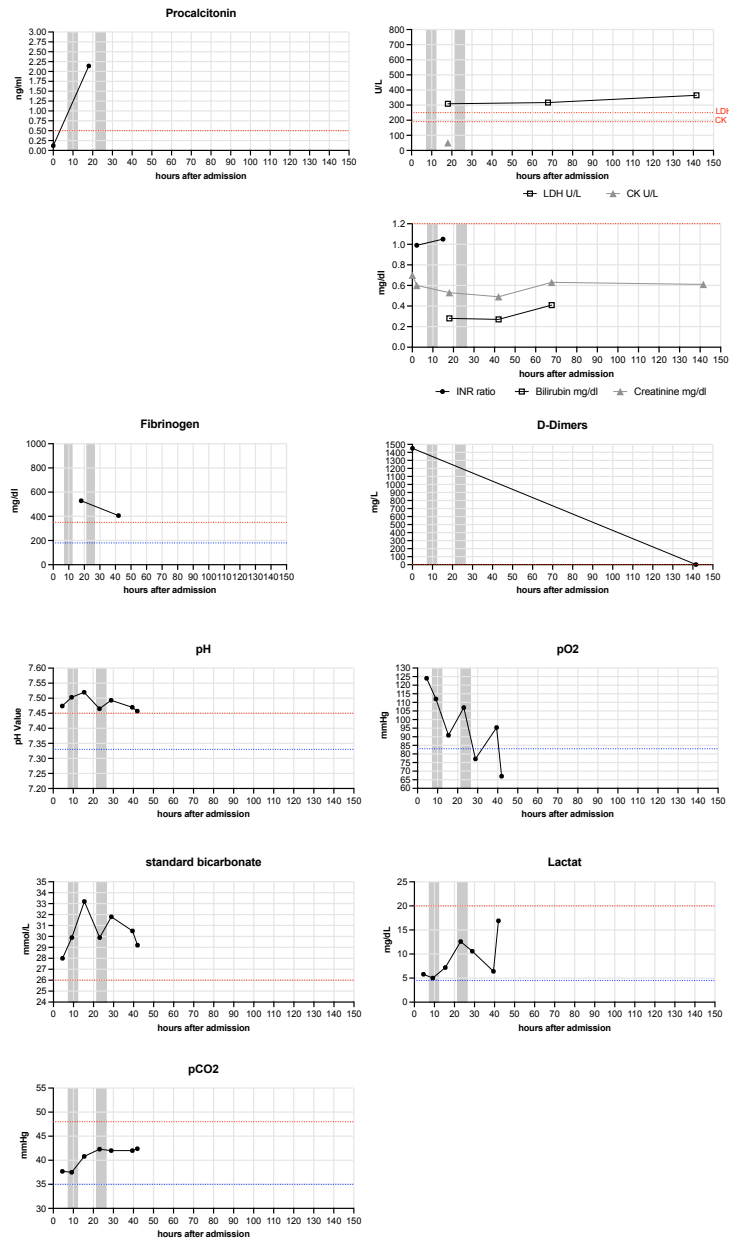

**Supplementary Figure S1: Respiratory and laboratory parameters of Patient 1.** Procalcitonin, CK, LDH, INR ratio, Bilirubin, Creatinine, Fibrinogen, D-Dimers pH, standard  $\text{HCO}_3^-$ , lactate, arterial  $\text{pCO}_2$  and  $\text{pO}_2$  were measured regularly for each patient and are depicted here. Blue lines indicate minimum baseline and red lines maximum baseline for each normal range. Grey bars indicate apheresis treatments.

Patient 2

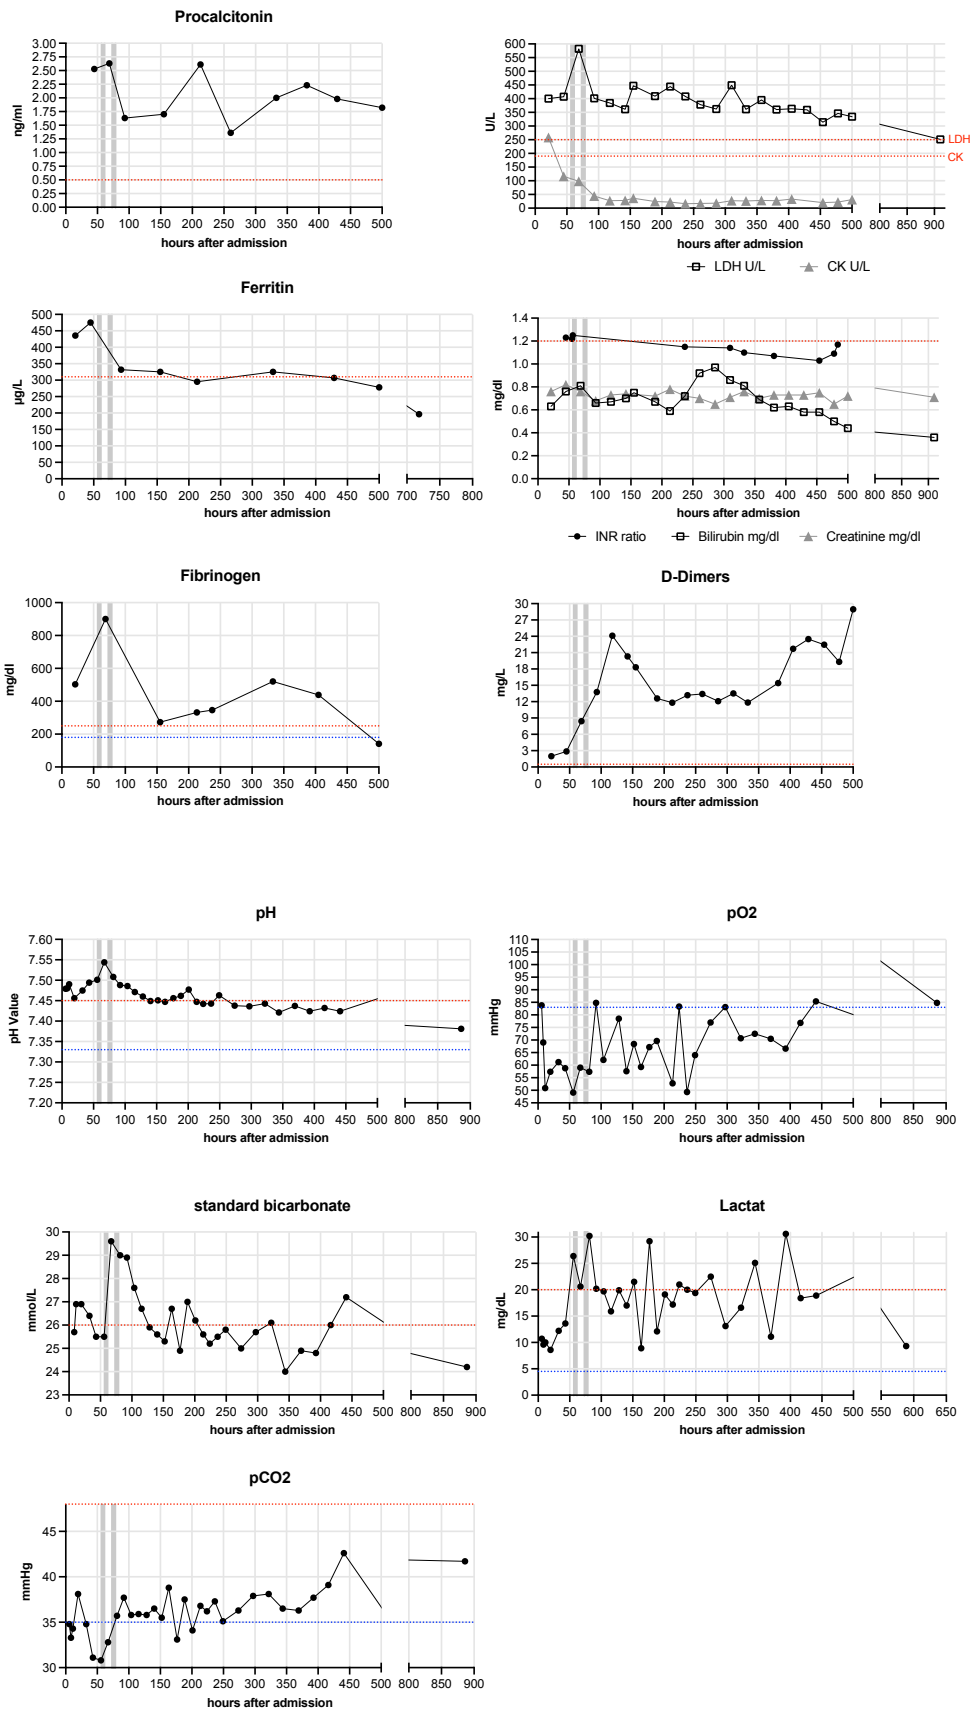

**Supplementary Figure S2: Respiratory and laboratory parameters of Patient 2.** Procalcitonin, CK-MB, CK, LDH, Ferritin, INR ratio, Bilirubin, Creatinine, Fibrinogen, D-Dimers pH, standard  $\text{HCO}_3^-$ , lactate, arterial  $\text{pCO}_2$  and  $\text{pO}_2$  were measured regularly for each patient and are depicted here. Blue lines indicate minimum baseline and red lines maximum baseline for each normal range. Grey bars indicate apheresis treatments.

Patient 3

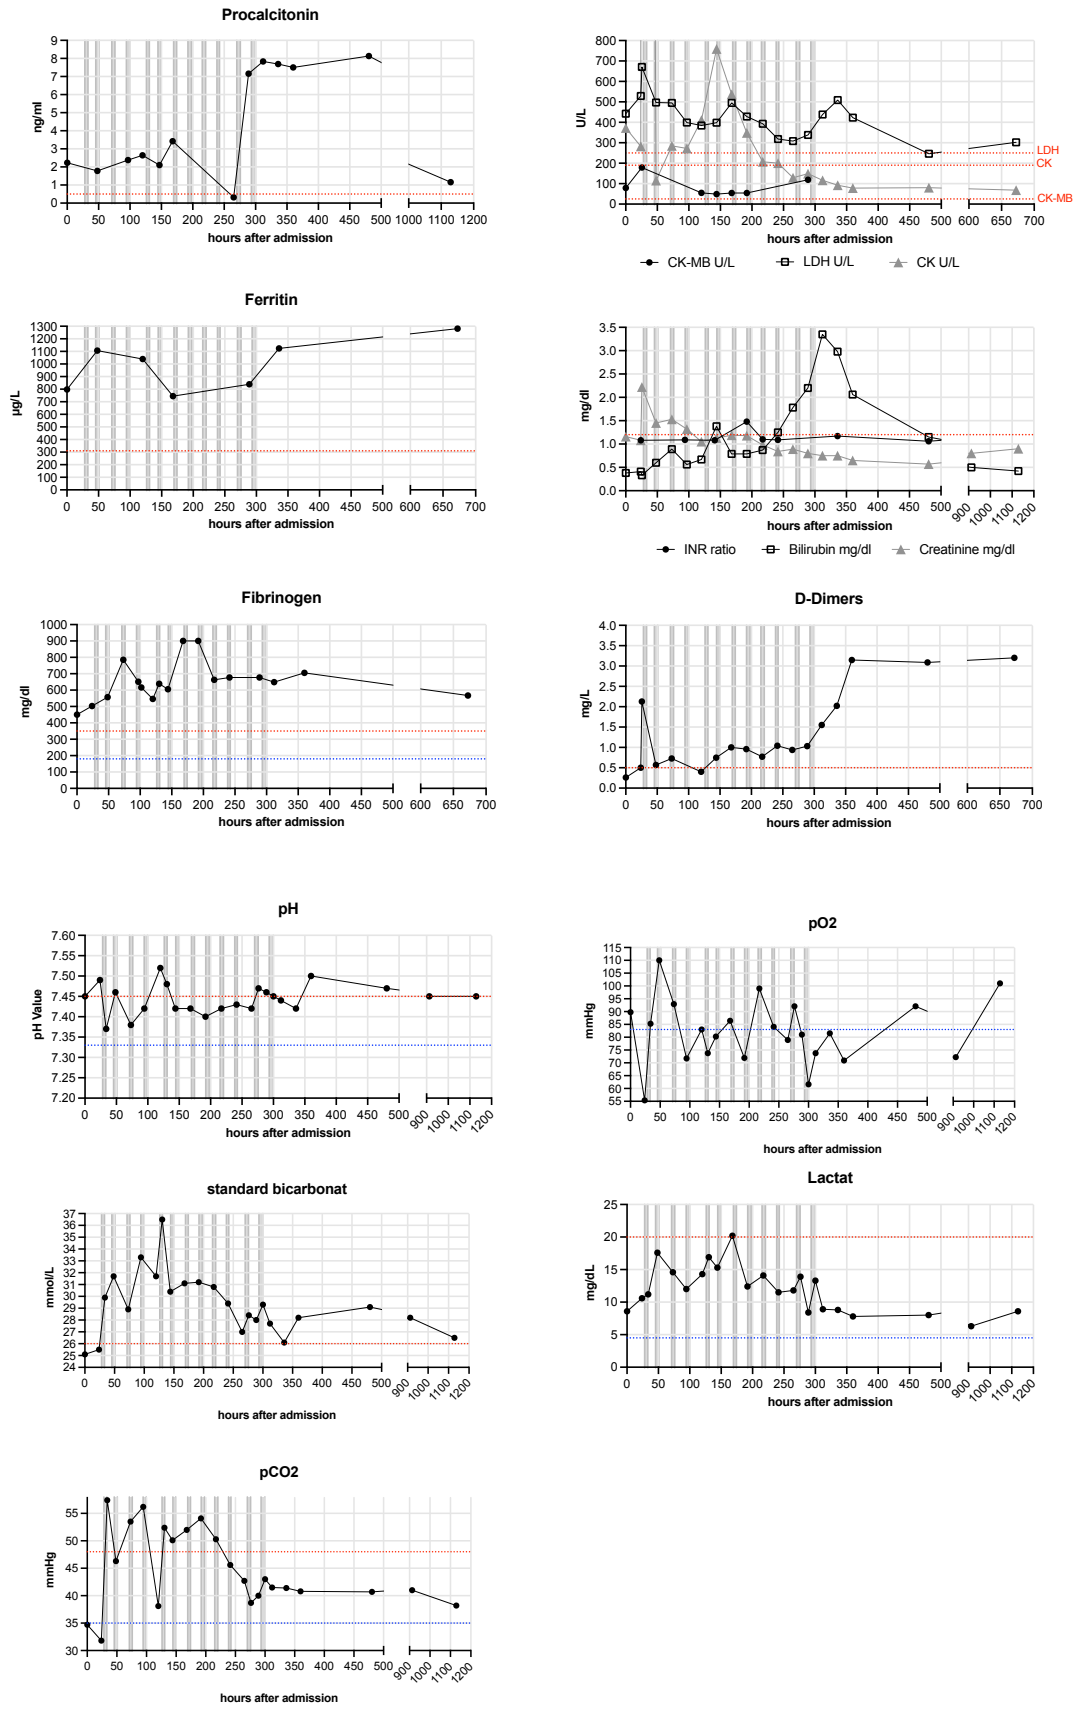

**Supplementary Figure S3: Respiratory and laboratory parameters of Patient 3.** Procalcitonin, CK-MB, CK, LDH, Ferritin, INR ratio, Bilirubin, Creatinine, Fibrinogen, D-Dimers pH, , standard  $\text{HCO}_3^-$ , lactate, arterial  $\text{pCO}_2$  and  $\text{pO}_2$  were measured regularly for each patient and are depicted here. Blue lines indicate minimum baseline and red lines maximum baseline for each normal range. Grey bars indicate apheresis treatments.

## Patient 5

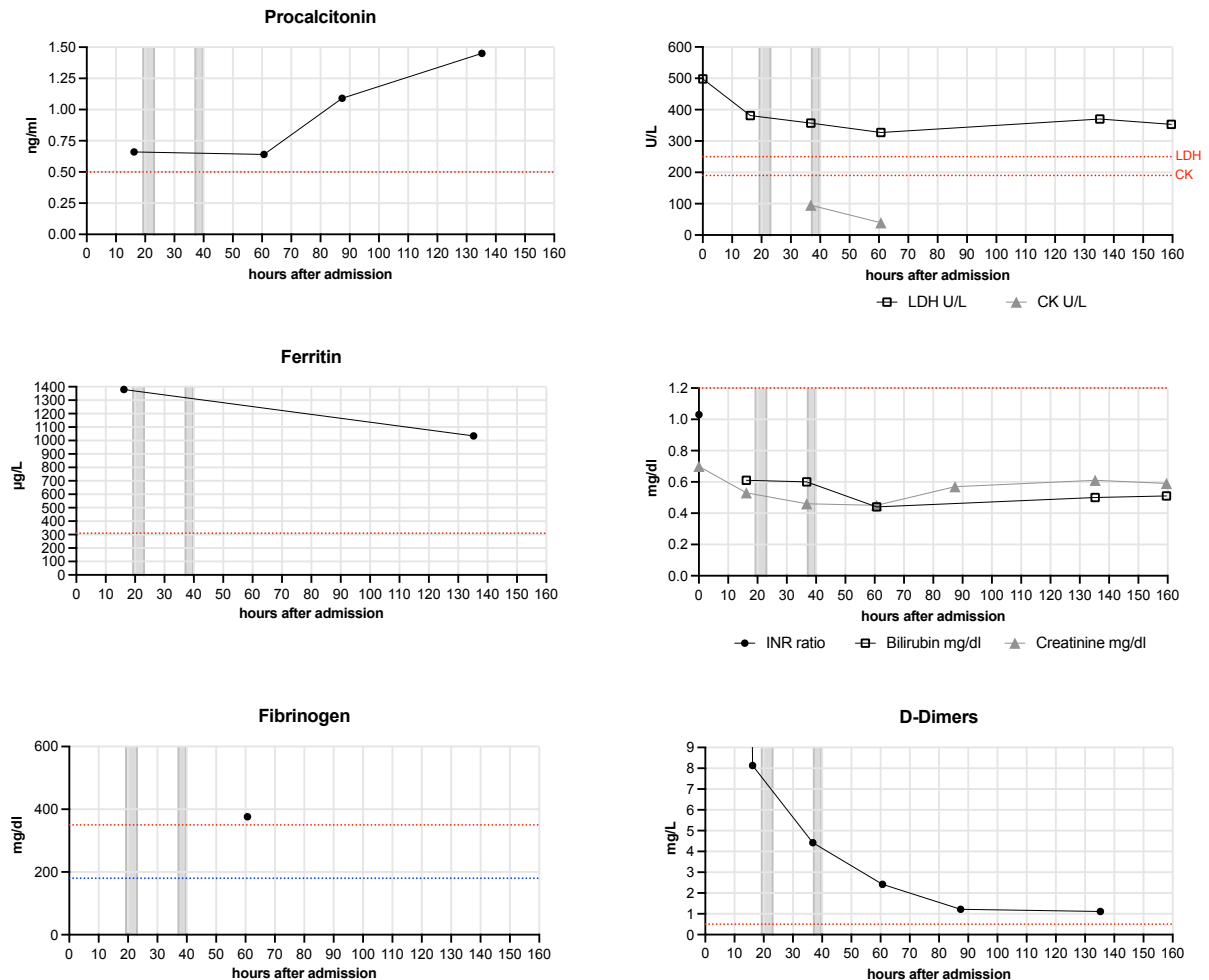

**Supplementary Figure S4: Respiratory and laboratory parameters of Patient 5.** Procalcitonin, CK, LDH, Ferritin, INR ratio, Bilirubin, Creatinine, Fibrinogen, D-Dimers were measured regularly for each patient and are depicted here. Blue lines indicate minimum baseline and red lines maximum baseline for each normal range. Grey bars indicate apheresis treatments.

# Patient 6

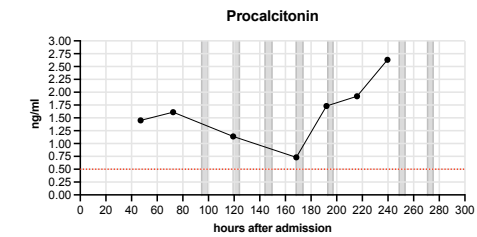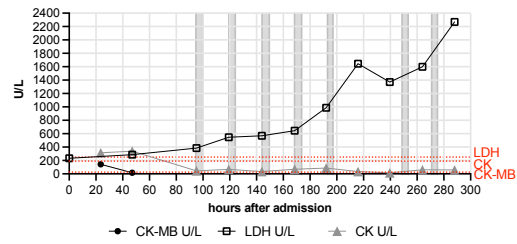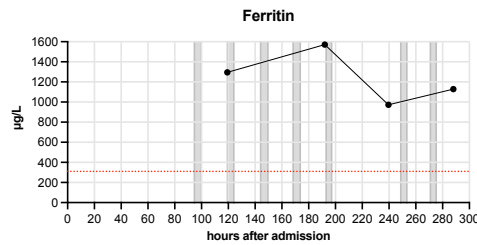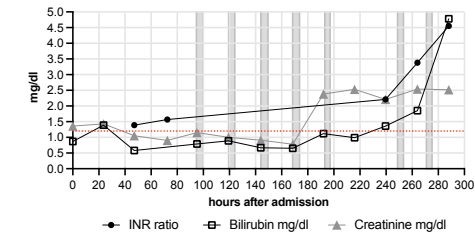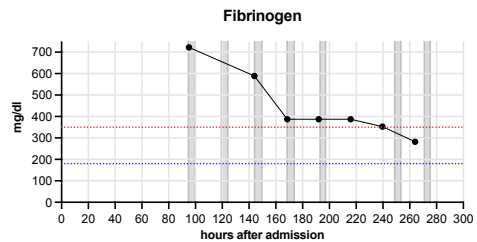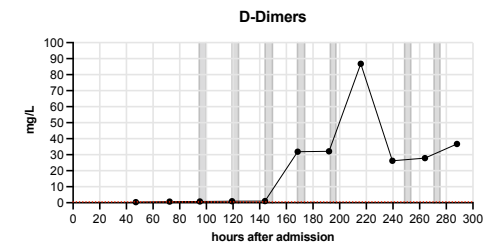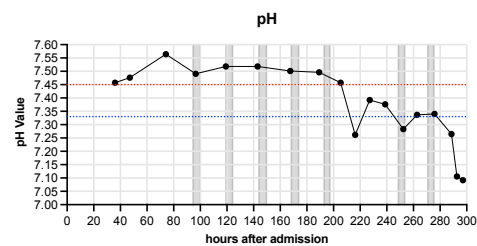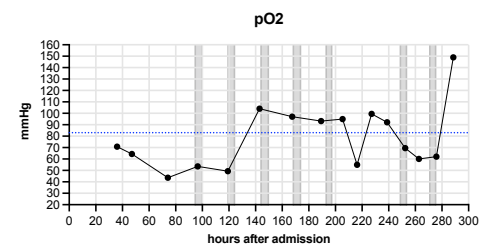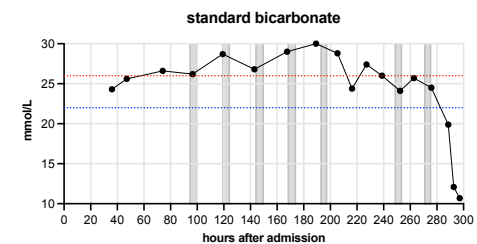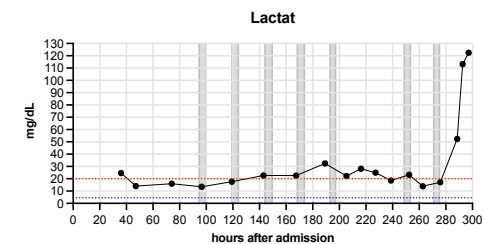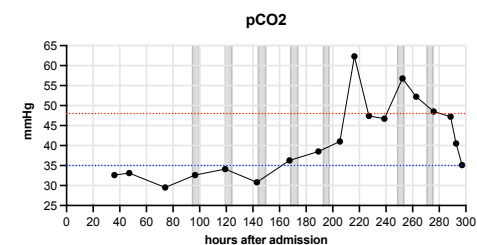

**Supplementary Figure S5: Respiratory and laboratory parameters of Patient 6.** Procalcitonin, CK-MB, CK, LDH, Ferritin, INR ratio, Bilirubin, Creatinine, Fibrinogen, D-Dimers pH, standard  $\text{HCO}_3^-$ , lactate, arterial  $\text{pCO}_2$  and  $\text{pO}_2$  were measured regularly for each patient and are depicted here. Blue lines indicate minimum baseline and red lines maximum baseline for each normal range. Grey bars indicate apheresis treatments.



## Patient 7

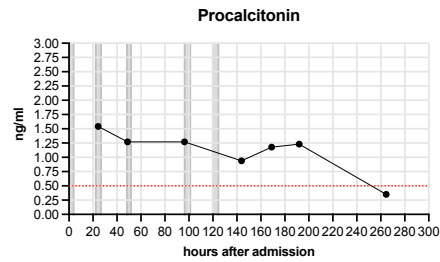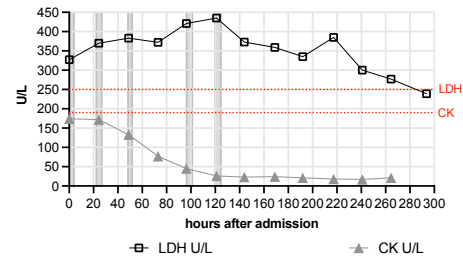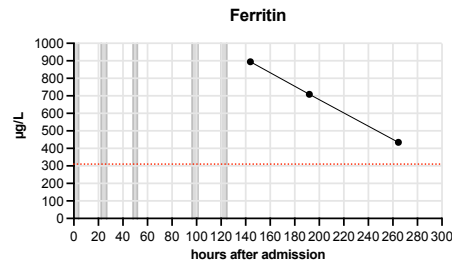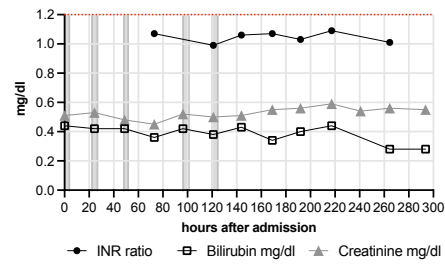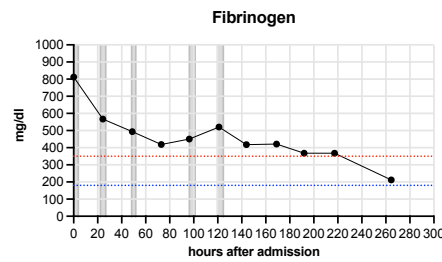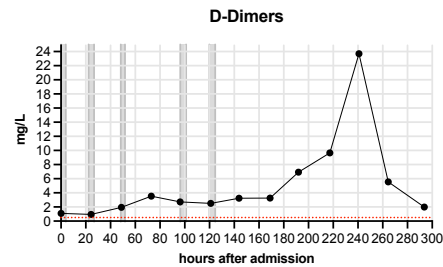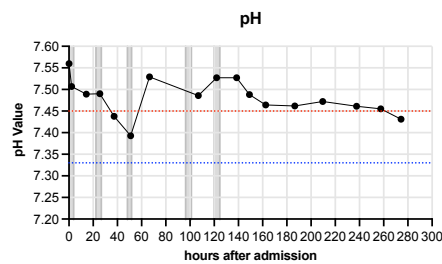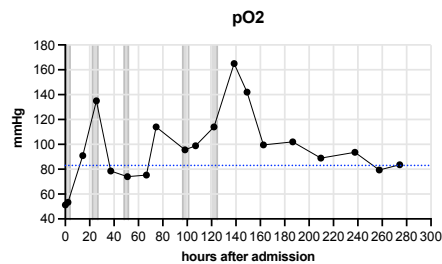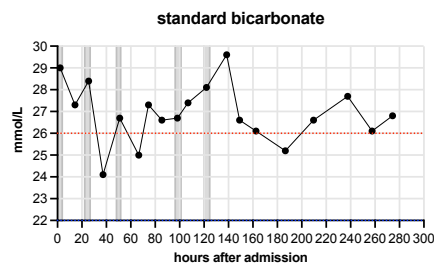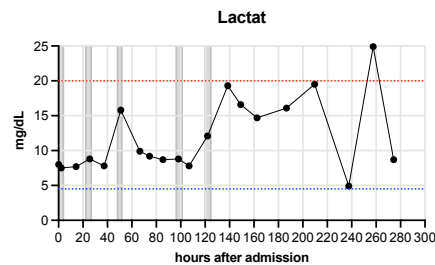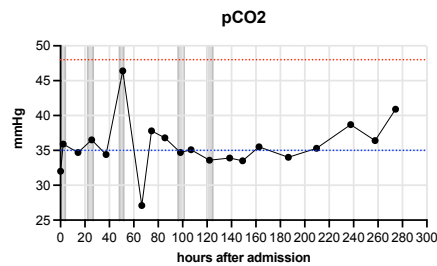

**Supplementary Figure S6: Respiratory and laboratory parameters of Patient 7.** Procalcitonin, CK-MB, CK, LDH, Ferritin, INR ratio, Bilirubin, Creatinine, Fibrinogen, D-Dimers pH, standard  $\text{HCO}_3^-$ , lactate, arterial  $\text{pCO}_2$  and  $\text{pO}_2$  were measured regularly for each patient and are depicted here. Blue lines indicate minimum baseline and red lines maximum baseline for each normal range. Grey bars indicate apheresis treatments.
